# Supplementary figures and images for: Dose–time fractionation schedules of preoperative radiotherapy and timing to surgery for rectal cancer
Source: PubMed Central journal article supplement — Ther Adv Med Oncol. 2020 Feb 29;12:1758835920907537. doi: 10.1177/1758835920907537 (PMC7052459; doi:10.1177/1758835920907537), 2020-02-29

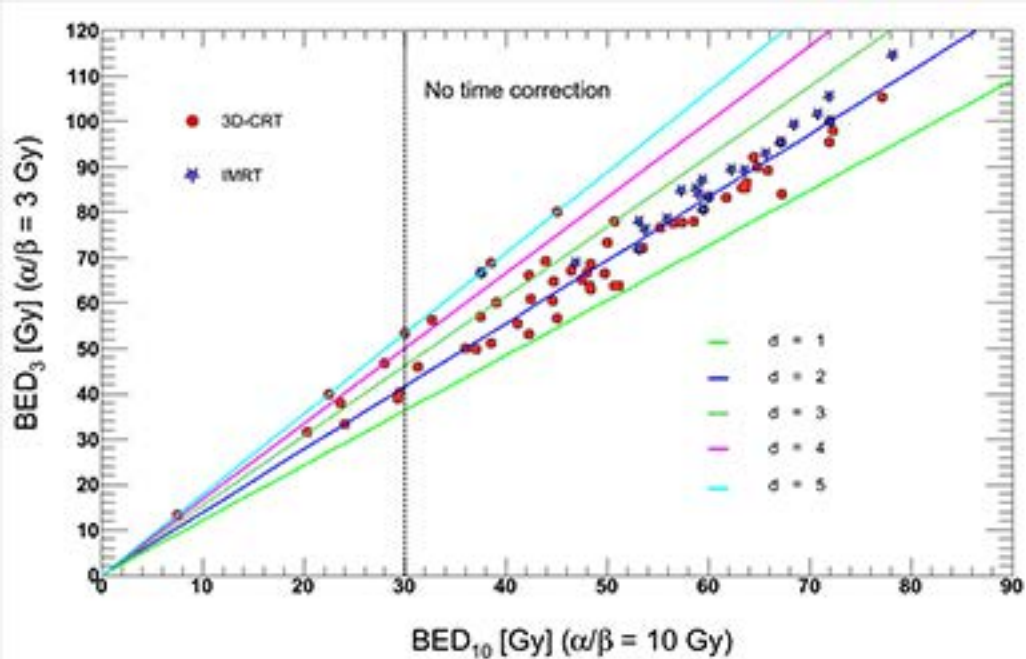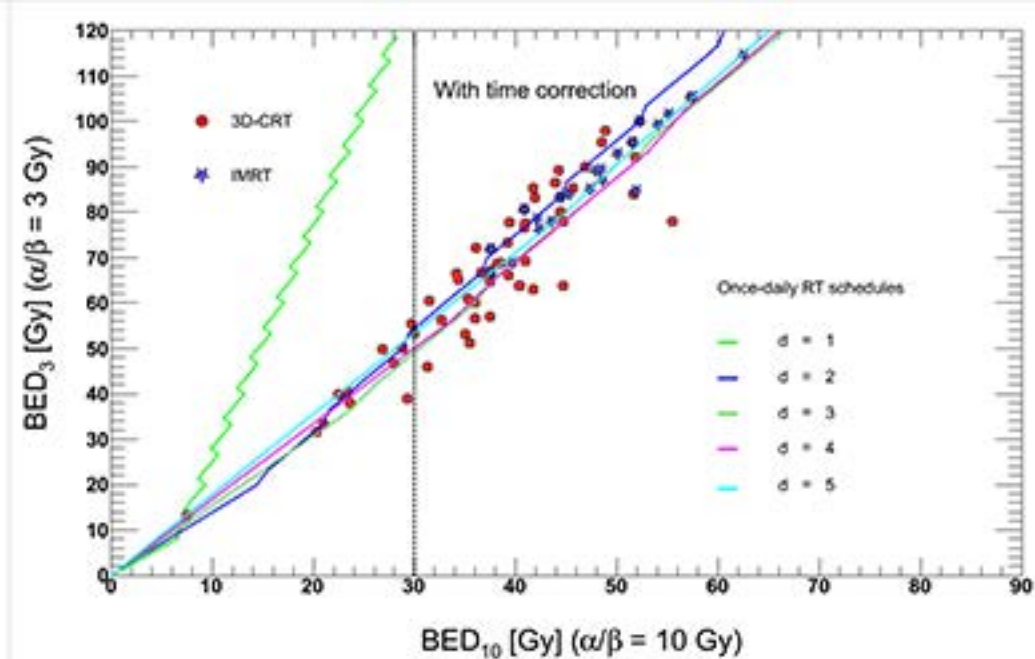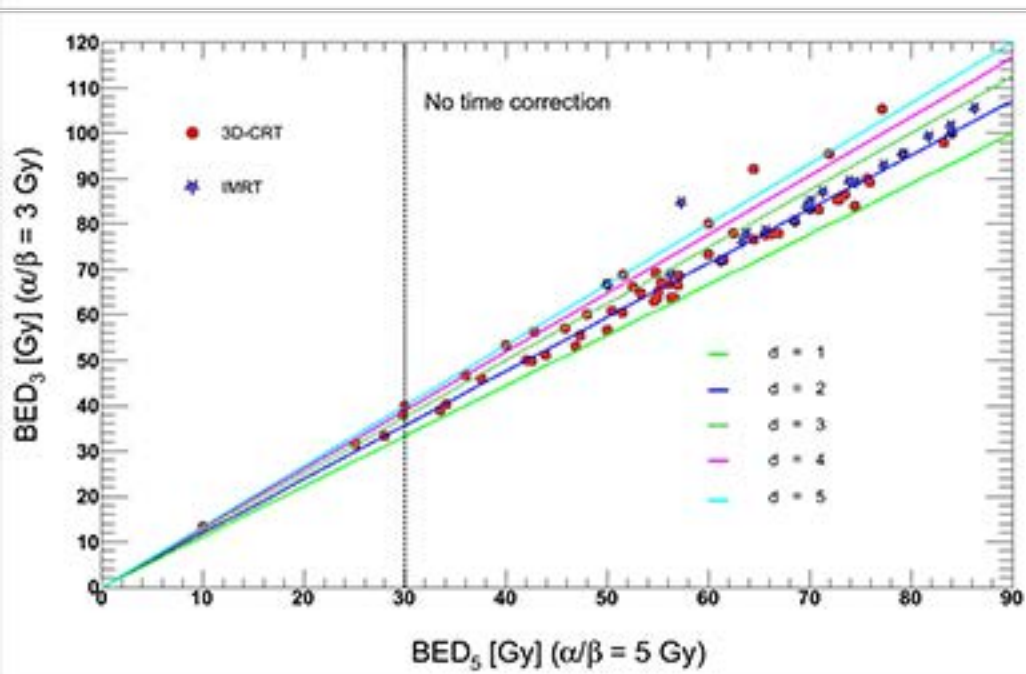

Supplement: Supplementary_Figure.pdf [file Supplementary_Figure.pdf]
